# Supplementary material for: Hydrothermal synthesis of porous α-Fe2O3 nanostructures for highly efficient Cr(vi) removal
Source: Royal Society of Chemistry journal article supplement (doi:10.1039/c3nj01659e), 2014-01-01
Supplement: c3nj01659e1.pdf [file c3nj01659e1.pdf]

## Electronic Supplementary Information (ESI)

### Hydrothermal synthesis of porous $\alpha$ -Fe<sub>2</sub>O<sub>3</sub> nanostructures for highly efficient Cr(VI) removal

*Er-tao Liu,<sup>a</sup> Huiping Zhao,<sup>a</sup> Hui Li,<sup>a</sup> Guangfang Li,<sup>a</sup> Yunling Liu<sup>b</sup> and Rong Chen<sup>\*a</sup>*

<sup>a</sup> School of Chemistry and Environmental Engineering, Wuhan Institute of Technology, Xiongchu Street, Wuhan, 430073, PR China

<sup>b</sup> State Key Laboratory of Inorganic Synthesis and Preparative Chemistry, College of Chemistry, Jilin University, Changchun, 130012, PR China

\* Corresponding author. Tel.: +86 13659815698; Fax: +86 2787194560.

E-mail: rchenhku@hotmail.com

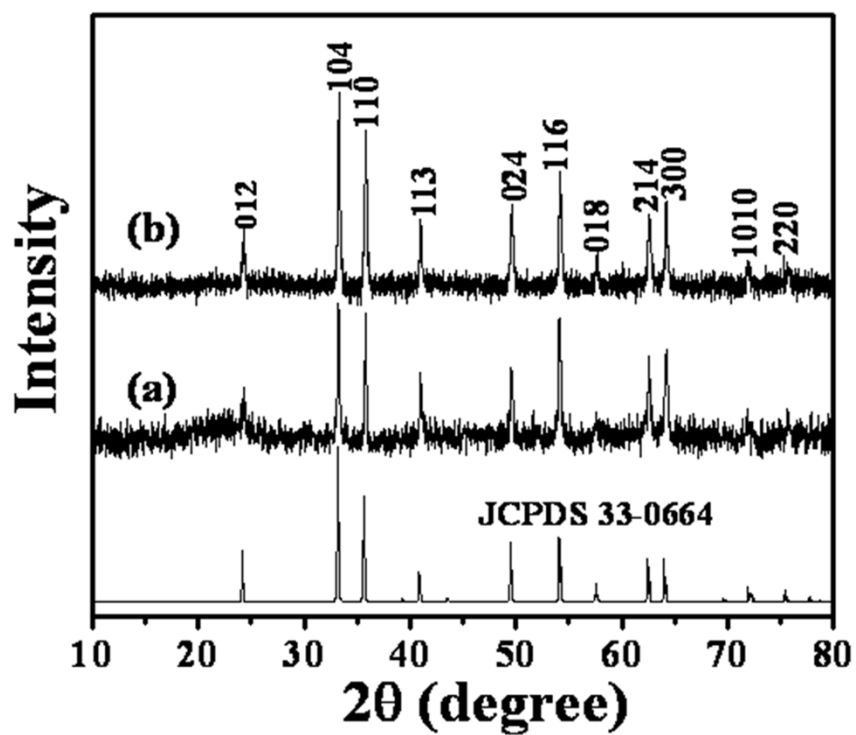

**Fig. S1** XRD patterns of  $\alpha$ - $\text{Fe}_2\text{O}_3$ : (a) S2; (b) S3.

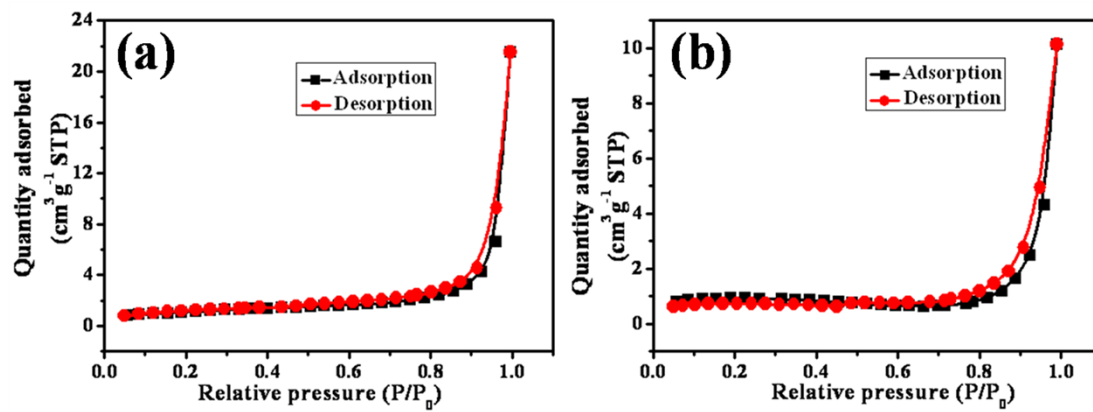

**Fig. S2** Nitrogen adsorption–desorption isotherms of  $\alpha$ -Fe<sub>2</sub>O<sub>3</sub> nanostructures: (a) S2; (b) S3.

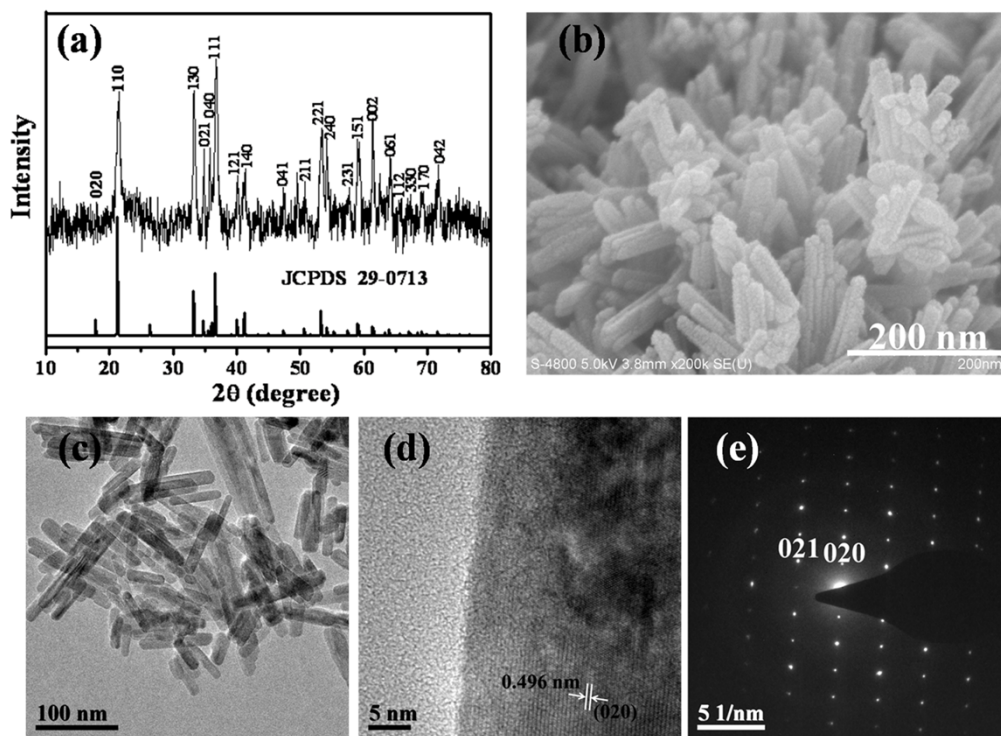

**Fig. S3** (a) XRD pattern, (b) SEM image, (c) TEM image (d) HR-TEM image and (e) SAED pattern of  $\alpha$ -FeOOH sample (S1 before calcinations).

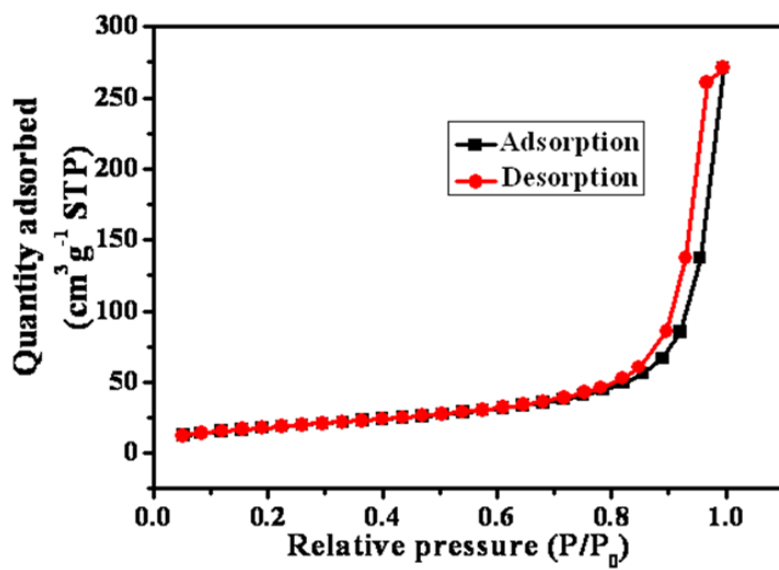

**Fig. S4** Nitrogen adsorption–desorption isotherm of  $\alpha$ -FeOOH nanorods.

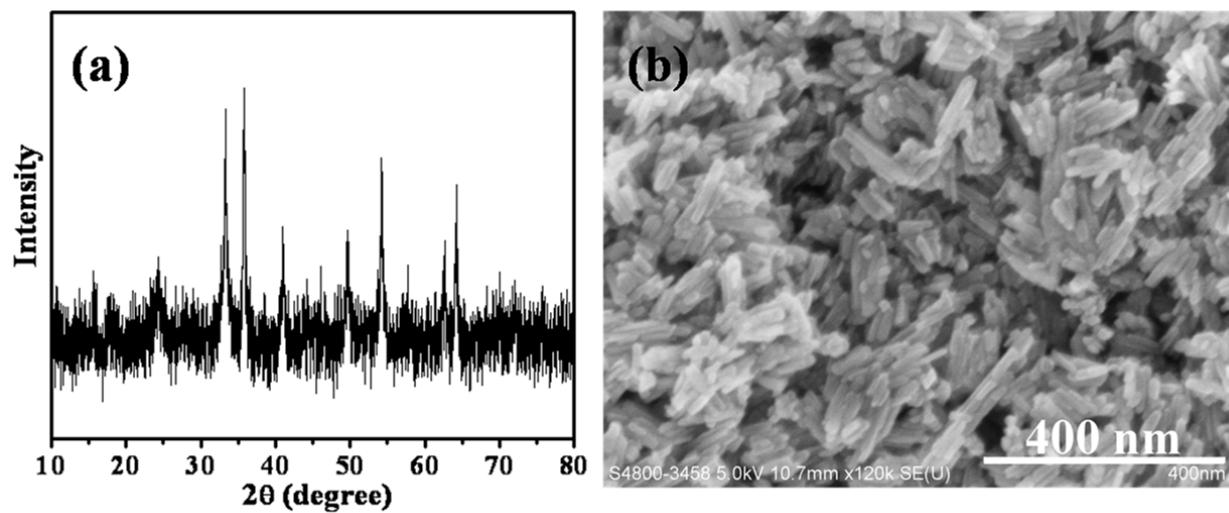

**Fig. S5** XRD pattern (a) and SEM image (b) of porous  $\alpha$ -Fe<sub>2</sub>O<sub>3</sub> nanorods after four cycles.

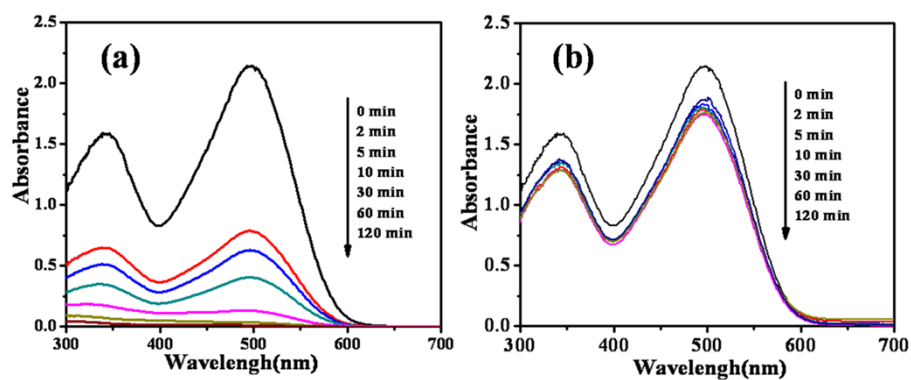

**Fig. S6** Time-dependent optical absorption spectra of Congo red solution with an initial concentration of  $100 \text{ mg L}^{-1}$  in the presence of  $30 \text{ mg}$  of porous  $\alpha\text{-Fe}_2\text{O}_3$  nanorod (a), and commercial  $\alpha\text{-Fe}_2\text{O}_3$  (b), respectively.
